# Supplementary material
Source: PubMed Central journal article supplement (PMC2626730)
Supplement: 0807614106_0807614106SI.pdf [file 0807614106_0807614106SI.pdf]

# Supporting Information

Dixit *et al.* 10.1073/pnas.0807614106

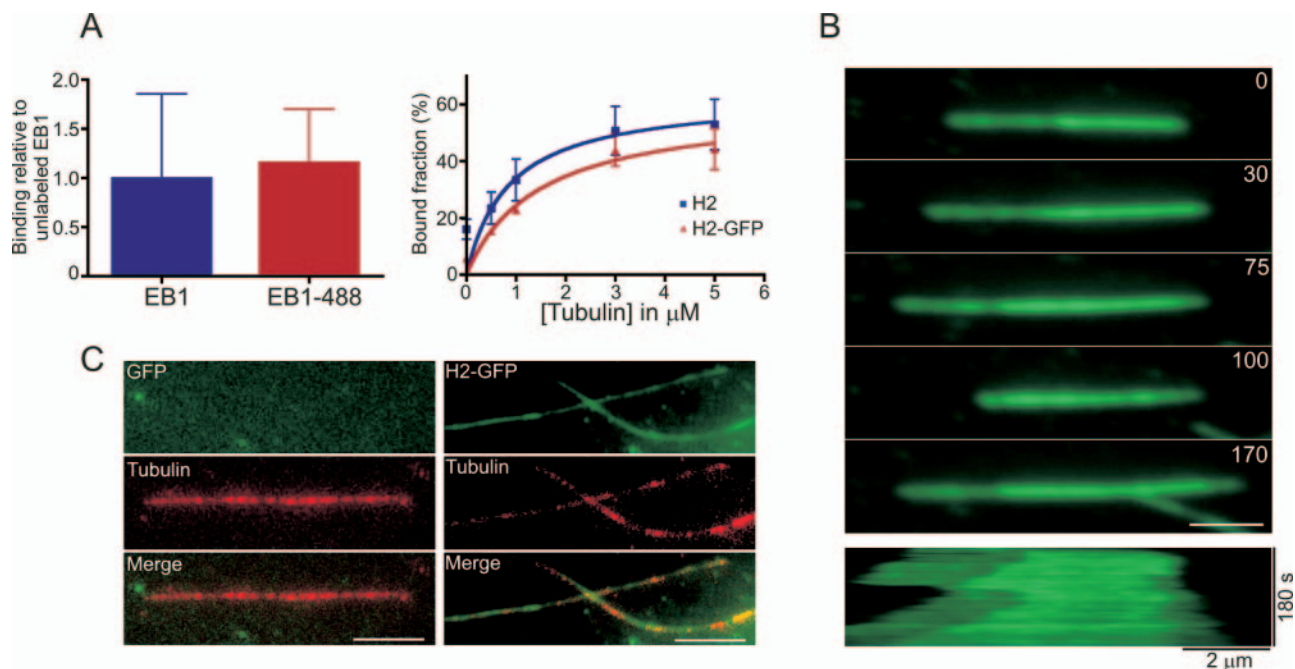

**Fig. S1.** Microtubule binding and labeling of +TIP proteins. (A) The bar graph on the left shows the average ( $\pm$ SD) from 3 or more replicates of the microtubule bound fraction of 3  $\mu\text{M}$  unlabeled EB1 and EB1-Alexa 488 proteins at 5  $\mu\text{M}$  microtubules normalized to the extent of binding observed for unlabeled EB1. The binding curves on the right show the percentage of microtubule bound fraction ( $\pm$ SD) from 3 independent experiments with 3  $\mu\text{M}$  unlabeled CLIP-170(H2) and CLIP-170(H2)-GFP proteins at increasing microtubule concentrations. These data were fit to a  $K_d$  of  $0.9 \pm 0.5 \mu\text{M}$  for unlabeled CLIP-170(H2) and  $1.5 \pm 0.6 \mu\text{M}$  for CLIP-170(H2)-GFP. In both cases, there is no statistical difference between the microtubule binding activities of unlabeled protein and fluorescently tagged protein. (B) The montage at the top shows the microtubule labeling pattern of 150 nM CLIP-170(H2). At the bottom is a kymograph of the same microtubule over the duration of the observation period. At this relatively high concentration, CLIP-170(H2) shows indiscriminate labeling of the entire microtubule length during both the polymerization and depolymerization phases of microtubule dynamics. The numbers in each frame indicate time (in seconds). (C) Comparison of the microtubule-binding activity of 150 nM GFP alone (*Left*) and 150 nM CLIP-170(H2)-GFP (*Right*). GFP alone, even at relatively high concentrations, exhibits no detectable binding to the microtubule lattice under our experimental conditions. (Scale bar, 2  $\mu\text{m}$ .)

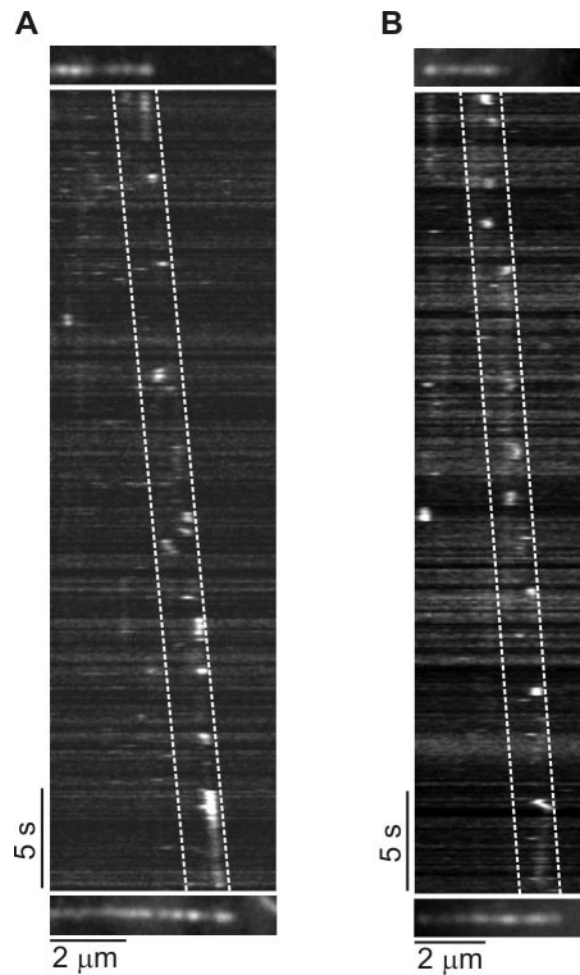

**Fig. S2.** Single-molecule kinetics of EB1-Alexa 488 and CLIP-170-GFP at growing microtubule plus-ends. In vitro reconstitution experiments were conducted with either 10 nM EB1-Alexa488 (A) or 5 nM CLIP-170(H2)-GFP together with 250 nM unlabeled EB1 (B) at a temporal resolution of 10 frames/s. The kymographs show binding and unbinding events of single EB1-Alexa488 (A) and CLIP-170(H2)-GFP (B) molecules at the plus-end of a growing microtubule (shown above and below the kymograph). Dwell times were determined for binding events occurring within a 1- $\mu$ m region along the growing microtubule tip (dotted lines).



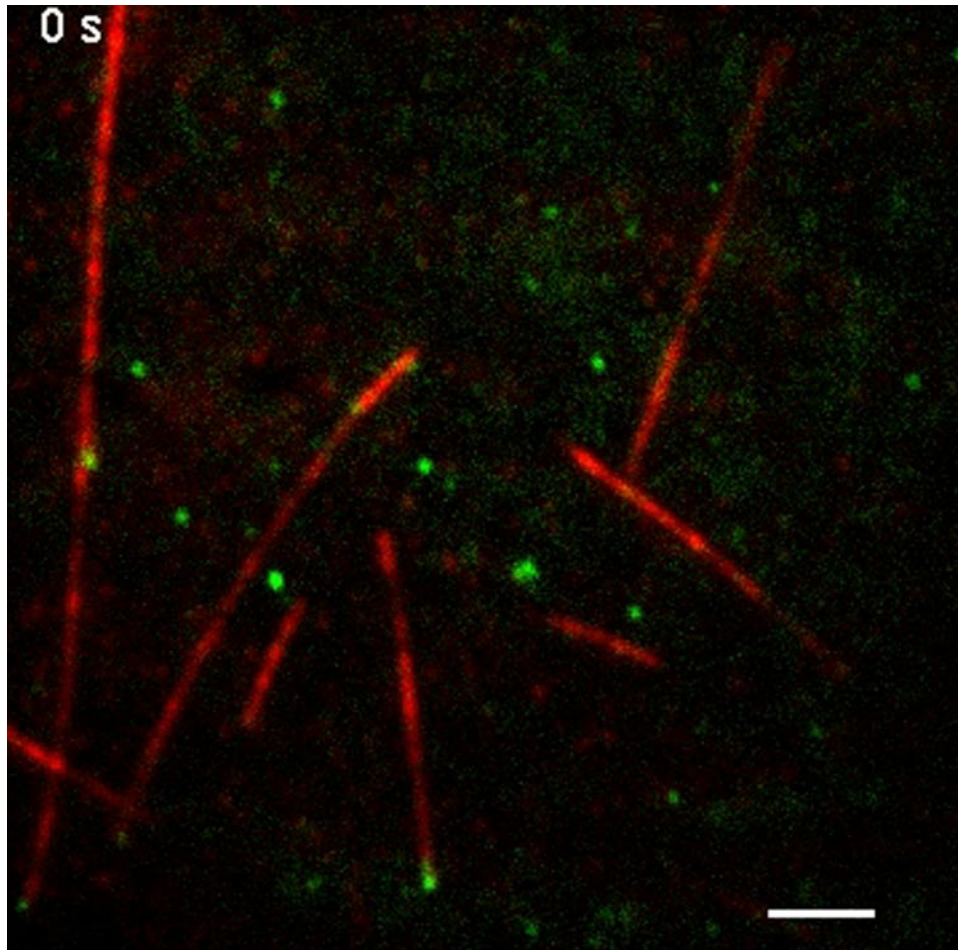

**Movie S1.** +TIP activity of Alexa 488–tagged EB1 protein. The movie shows pseudocolored overlaid images of rhodamine-labeled microtubules (red) and Alexa 488–tagged EB1 protein (green). EB1–Alexa 488 specifically decorates growing microtubule plus-ends and is lost during microtubule shortening phases. (Scale bar, 2  $\mu\text{m}$ .)

[Movie S1 \(MOV\)](#)

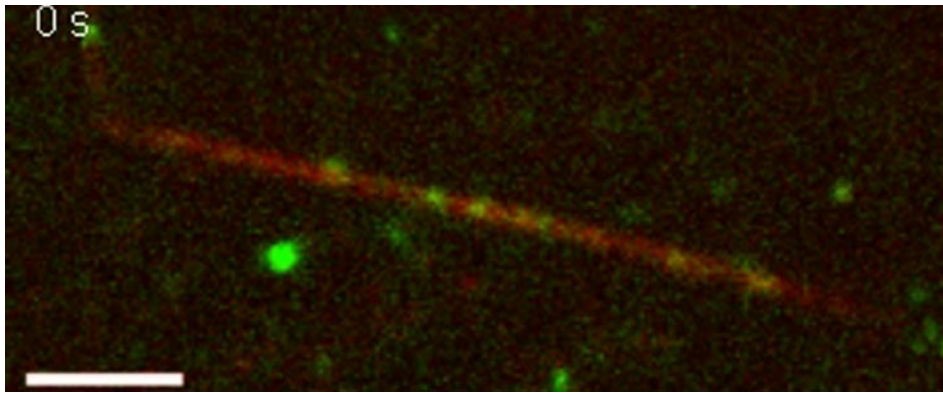

**Movie S2.** Lattice diffusion of CLIP-170(H2)–GFP protein. The movie shows pseudocolored overlaid images of rhodamine-labeled microtubules (red) and GFP-tagged CLIP-170(H2) protein (green). In the absence of EB1, CLIP-170(H2) binds along the length of the microtubule lattice and exhibits diffusive movement (blue arrowhead). (Scale bar, 2  $\mu\text{m}$ .)

[Movie S2 \(MOV\)](#)

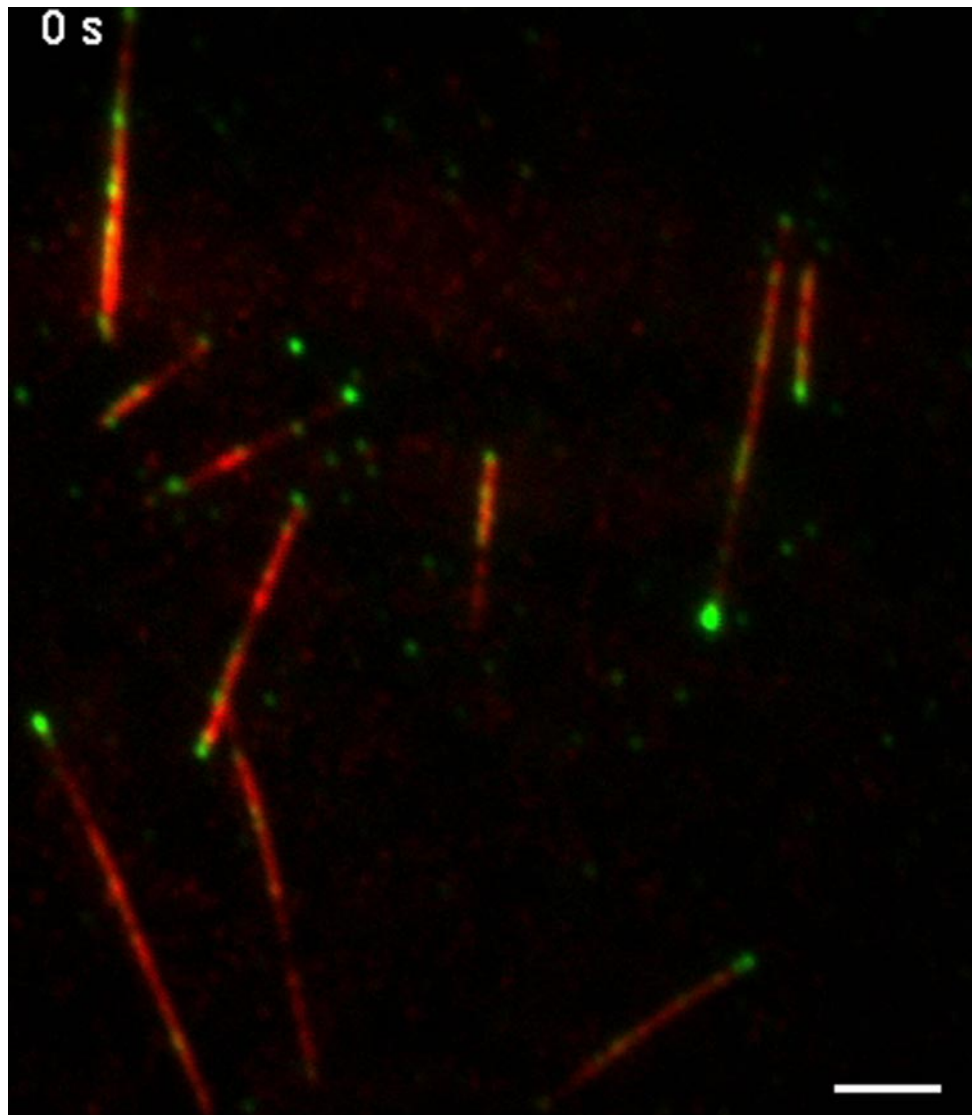

**Movie S3.** +TIP activity of CLIP-170(H2)-GFP in the presence of EB1 protein. The movie shows pseudocolored overlaid images of rhodamine-labeled microtubules (red) and GFP-tagged CLIP-170(H2) protein (green). In the presence of unlabeled EB1, CLIP-170(H2)-GFP specifically localizes to growing microtubule plus-ends and is lost during microtubule shortening phases. (Scale bar, 2  $\mu\text{m}$ .)

[Movie S3 \(MOV\)](#)

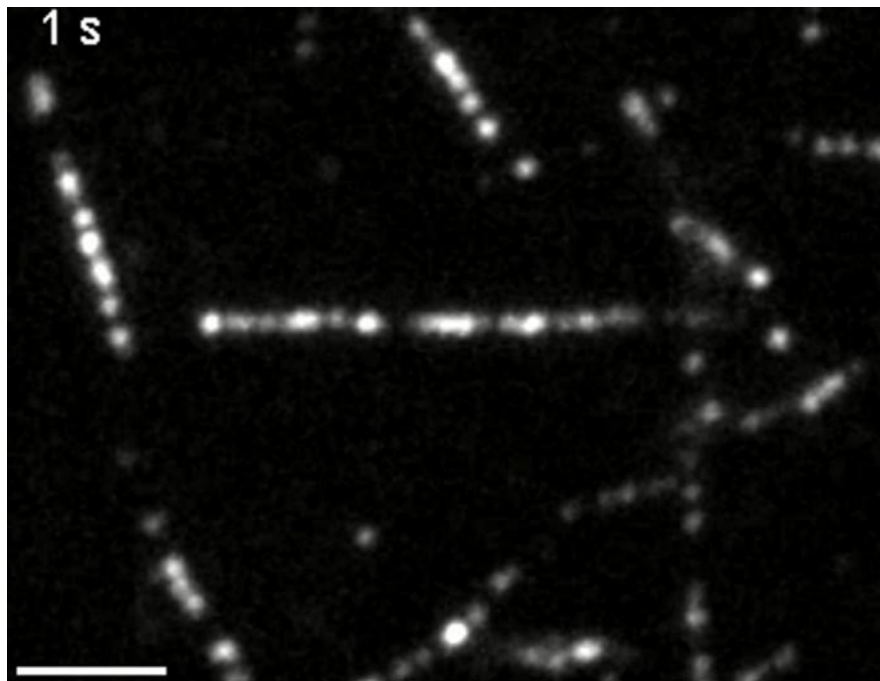

**Movie S4.** GMPCPP abolishes +TIP activity of the CLIP-170(H2)–EB1 complex. The movie shows the localization of CLIP-170(H2)–GFP molecules on GMPCPP microtubules in the presence of unlabeled EB1. In the absence of GTP hydrolysis, the CLIP-170(H2)–EB1 complex does not specifically target growing microtubule plus-ends, but instead binds along the length of the microtubule lattice. (Scale bar, 2  $\mu\text{m}$ .)

[Movie S4 \(MOV\)](#)
